# Supplementary material for: CQUIN audit for prescription of antibiotics for urinary tract infections in an acute medical assessment unit
Source: PubMed Central journal article supplement — BMJ Qual Improv Rep. 2015 May 20;4(1):u208446.w3374. doi: 10.1136/bmjquality.u208446.w3374 (PMC4645900; doi:10.1136/bmjquality.u208446.w3374), 2015-05-20
Supplement: bmjqir-4-u208446-w3374-s2.pdf [file bmjqir-4-u208446-w3374-s2.pdf]

# Re-audit of CQUIN UTI antibiotic prescription after intervention

# Antibiotics prescribed to culture confirmed UTI

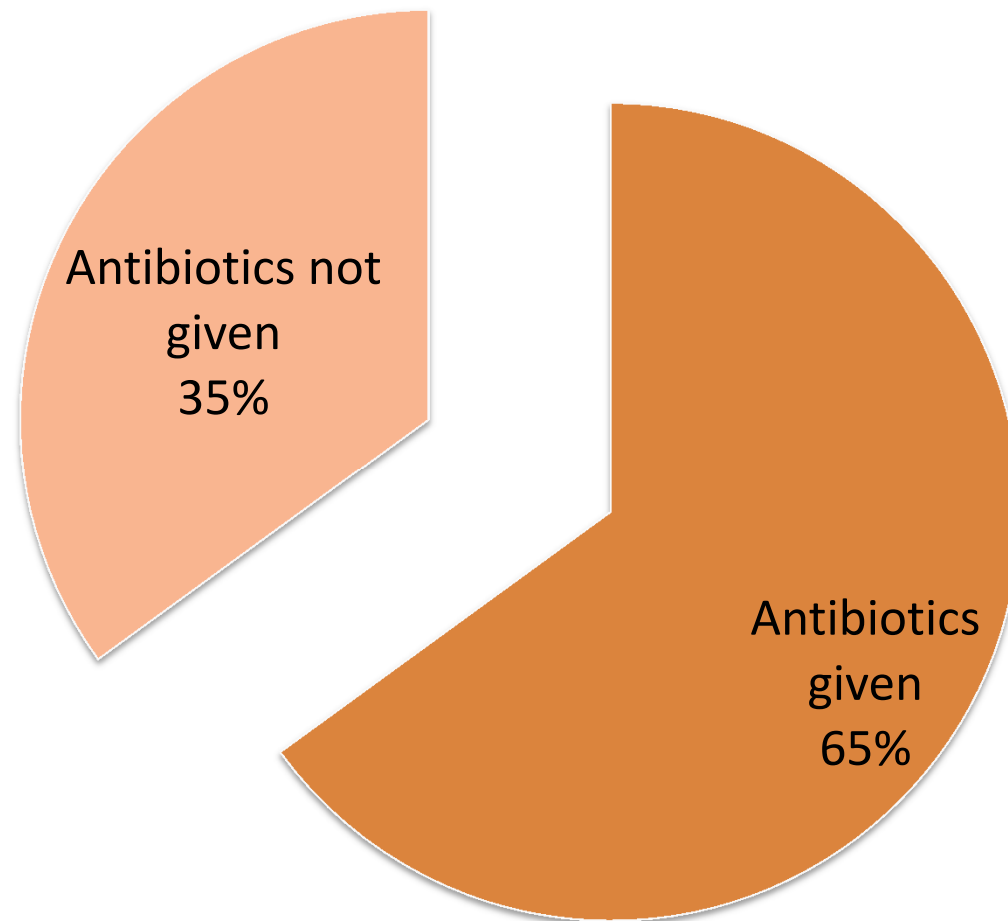

## Stop date on drug chart

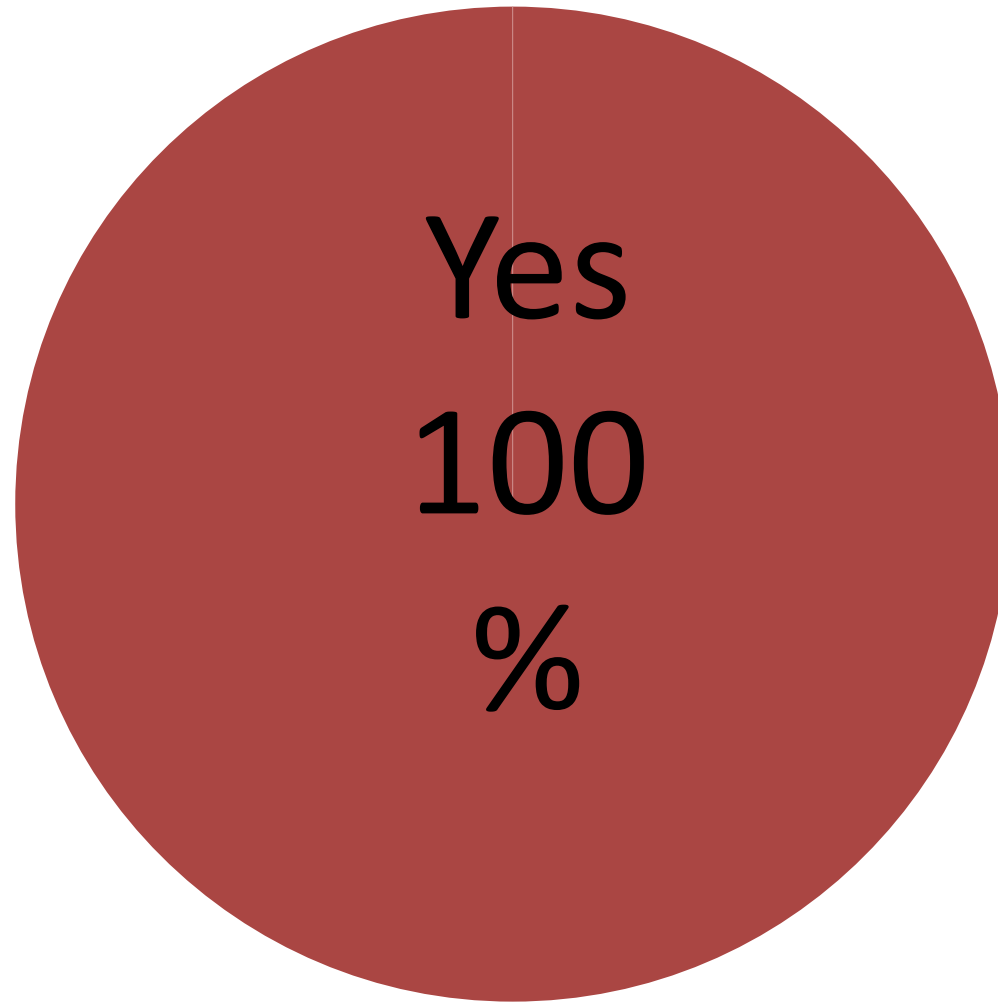

## Number of Antibiotics given

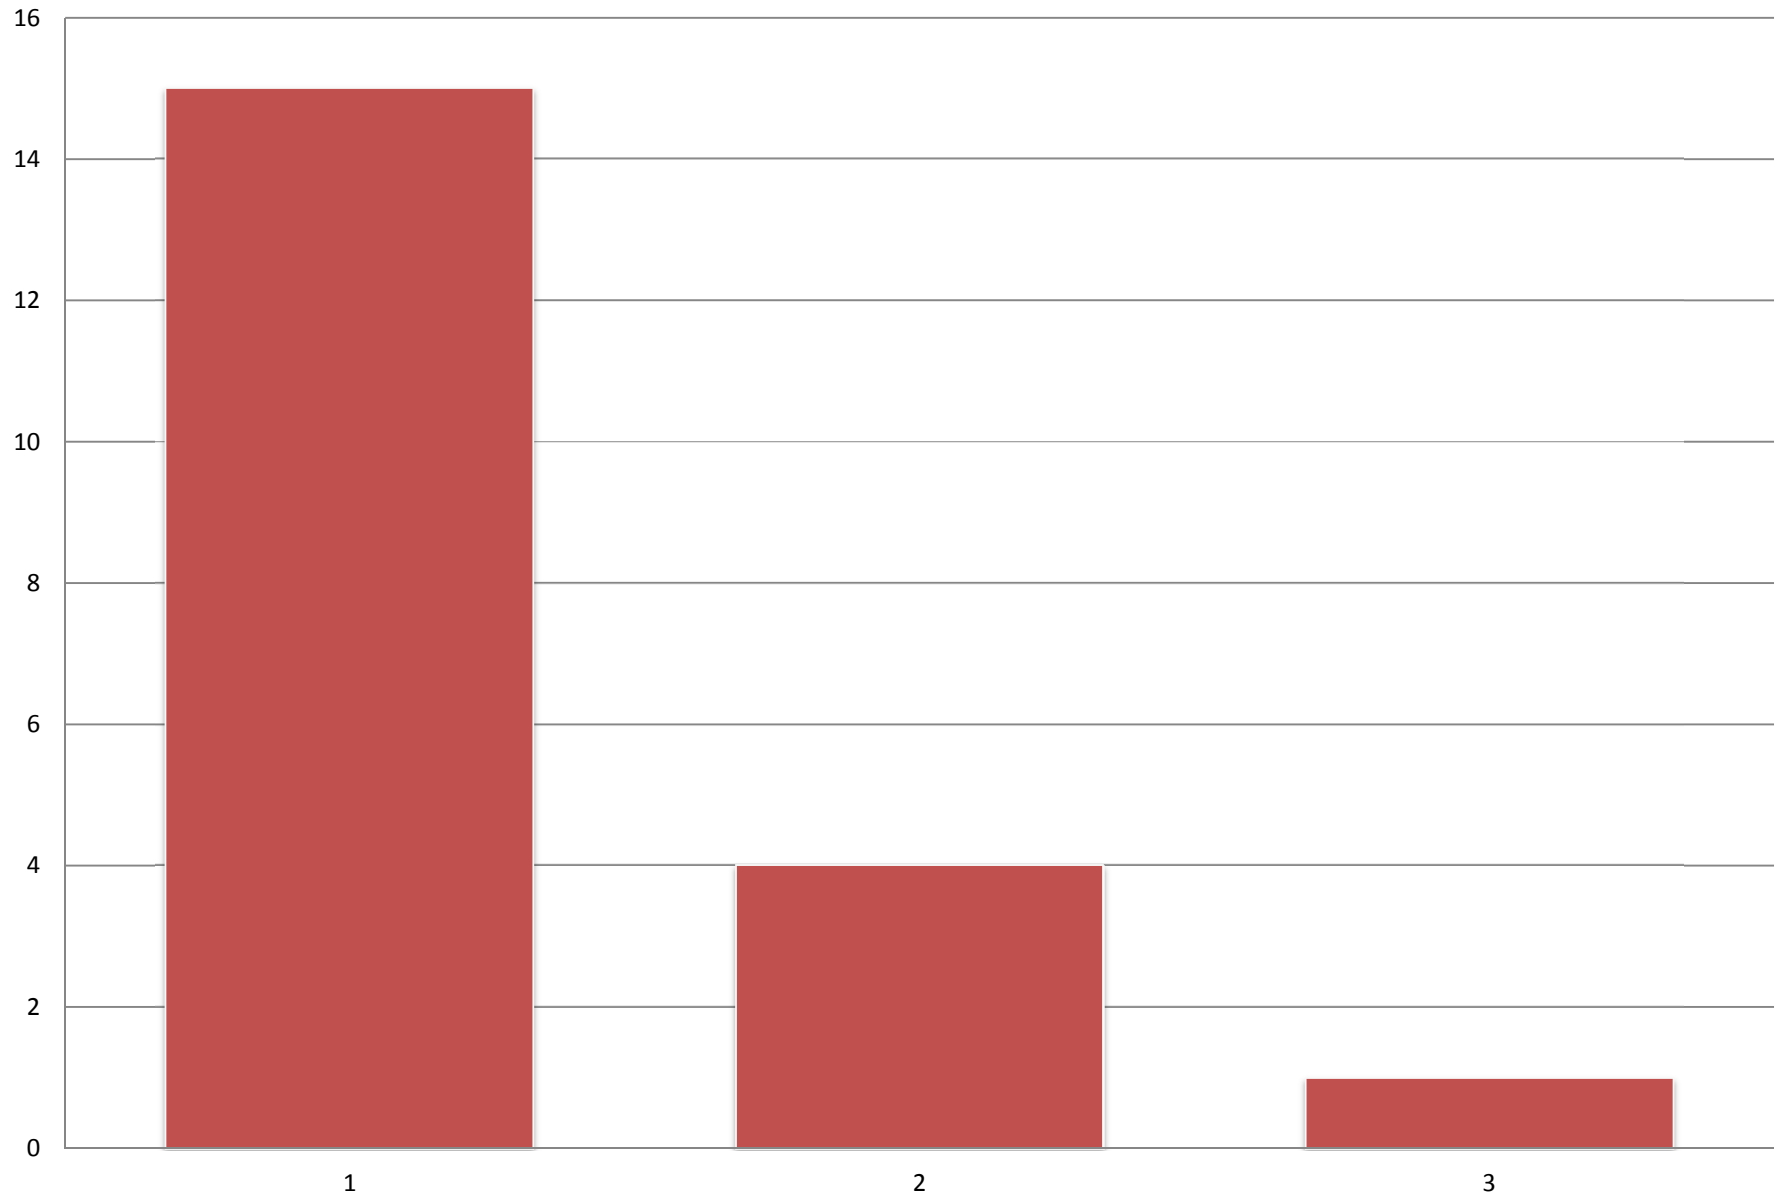

## Compliance to guidelines

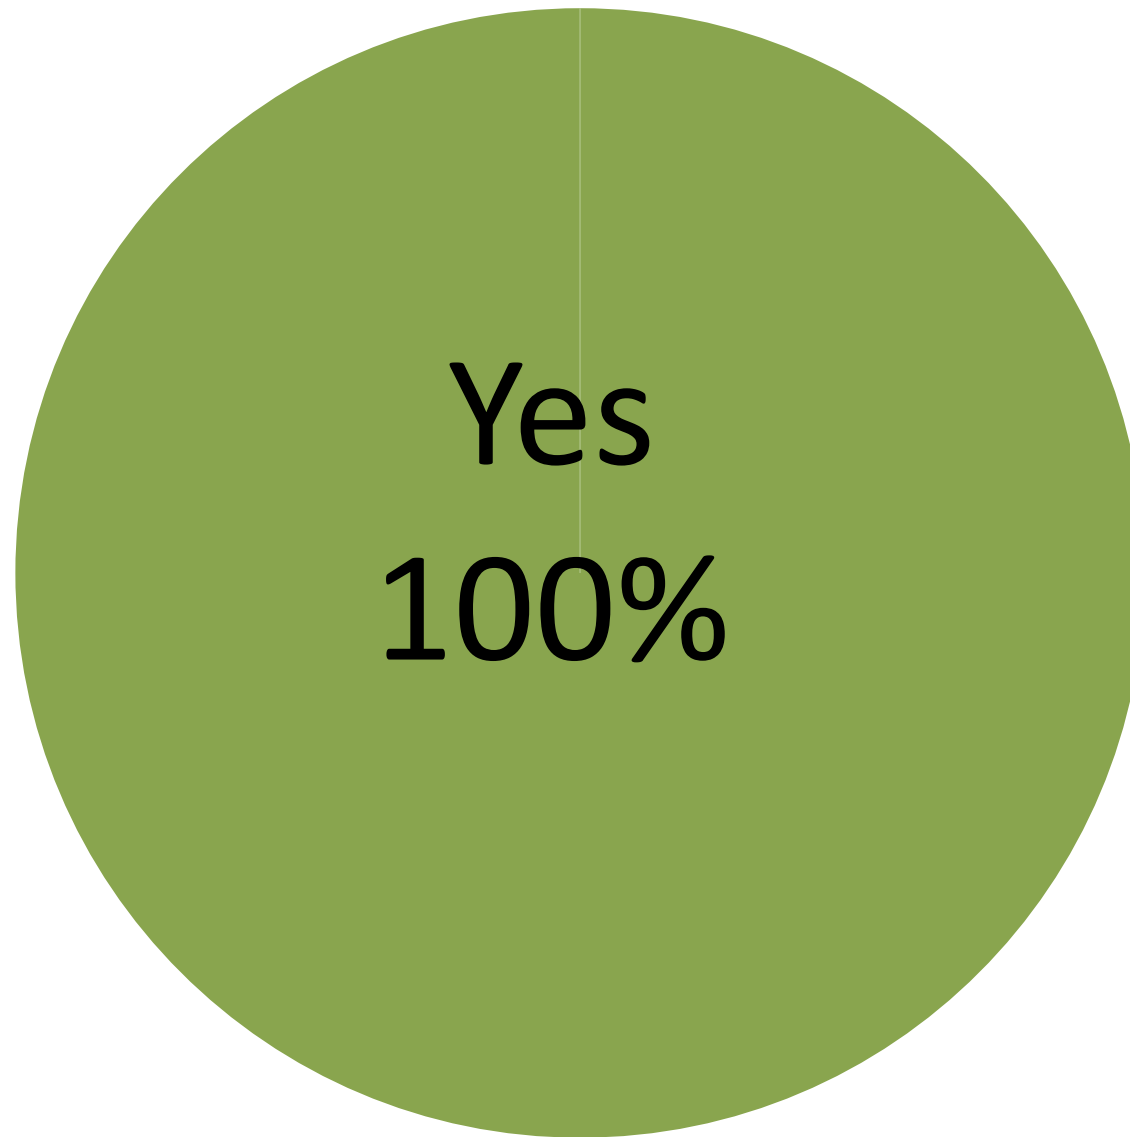

# Duration on antibiotic 1

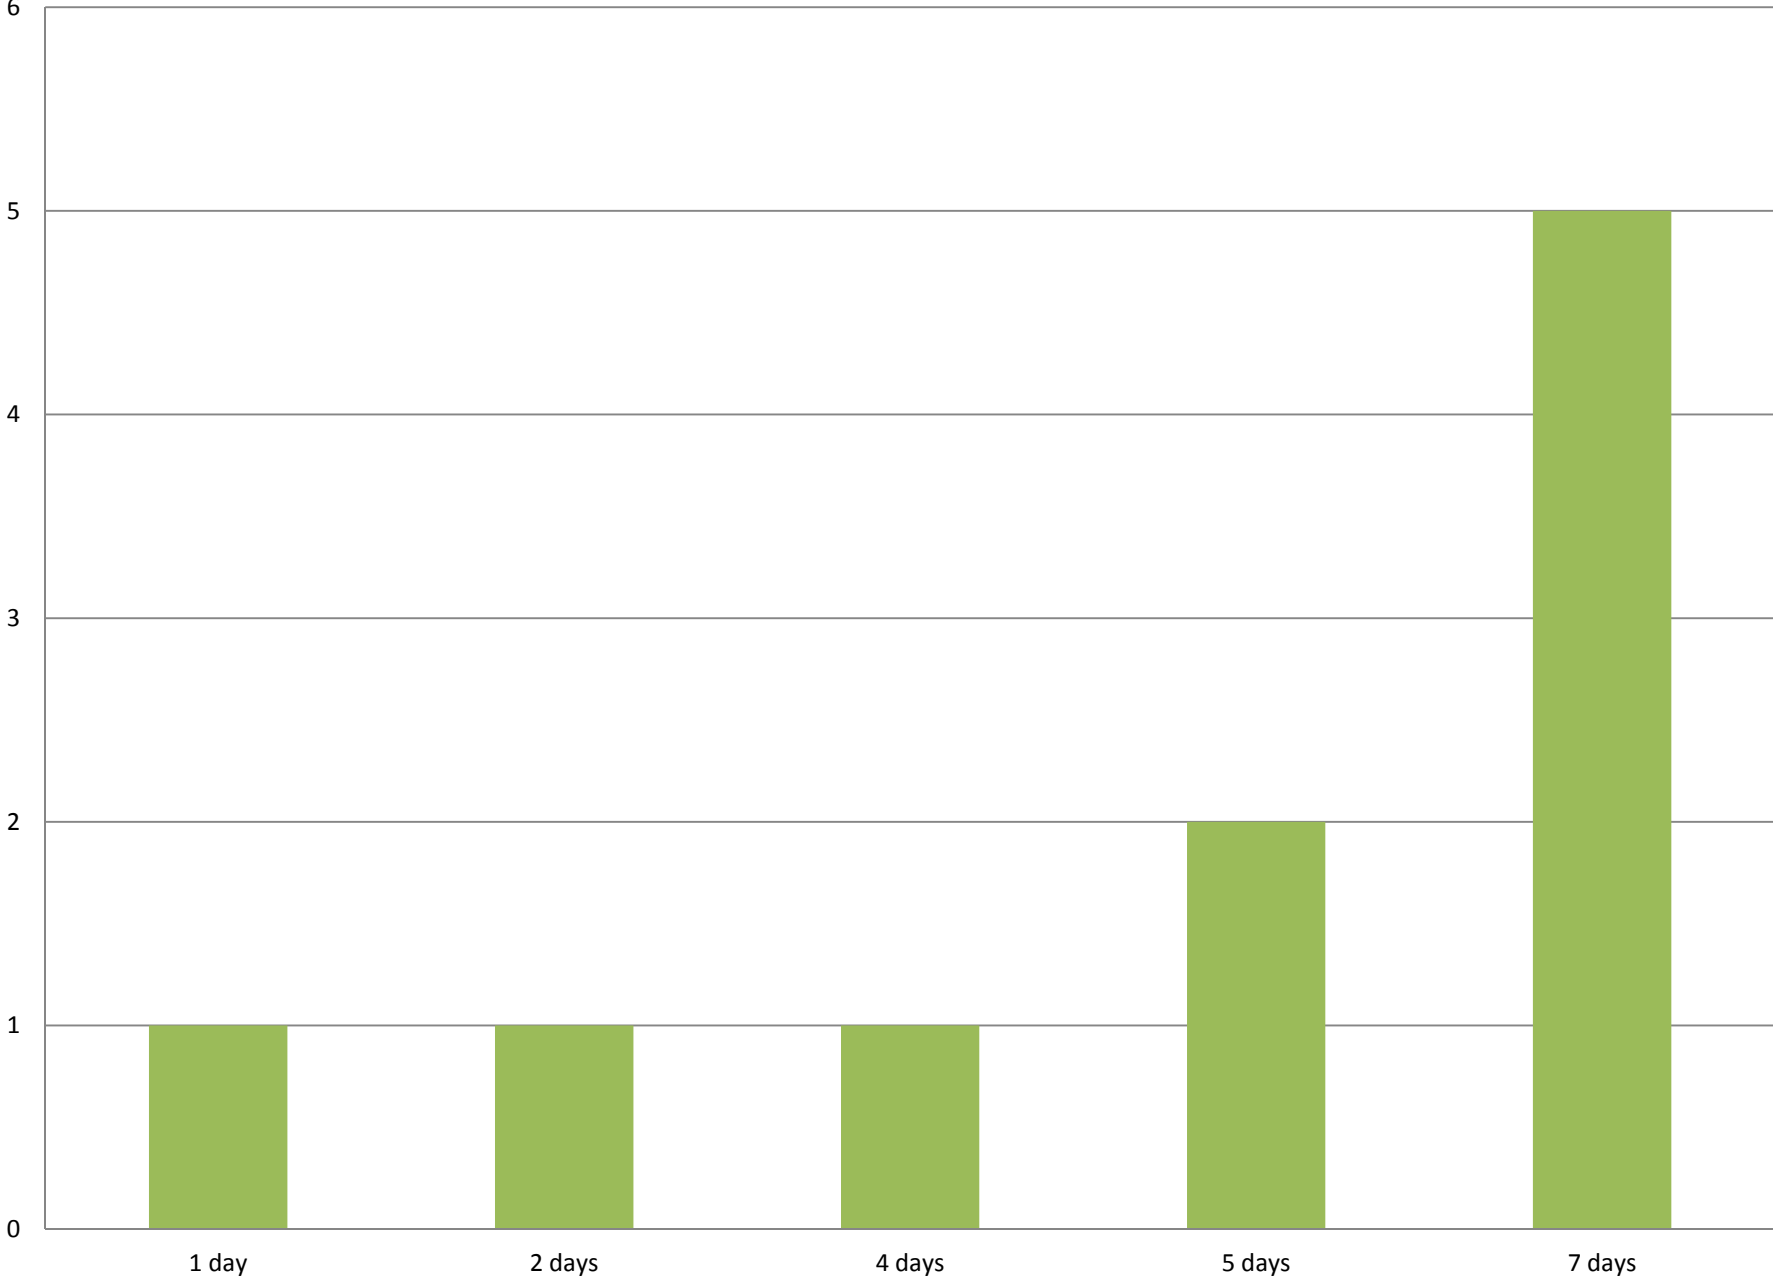

**Patient symptomatic**

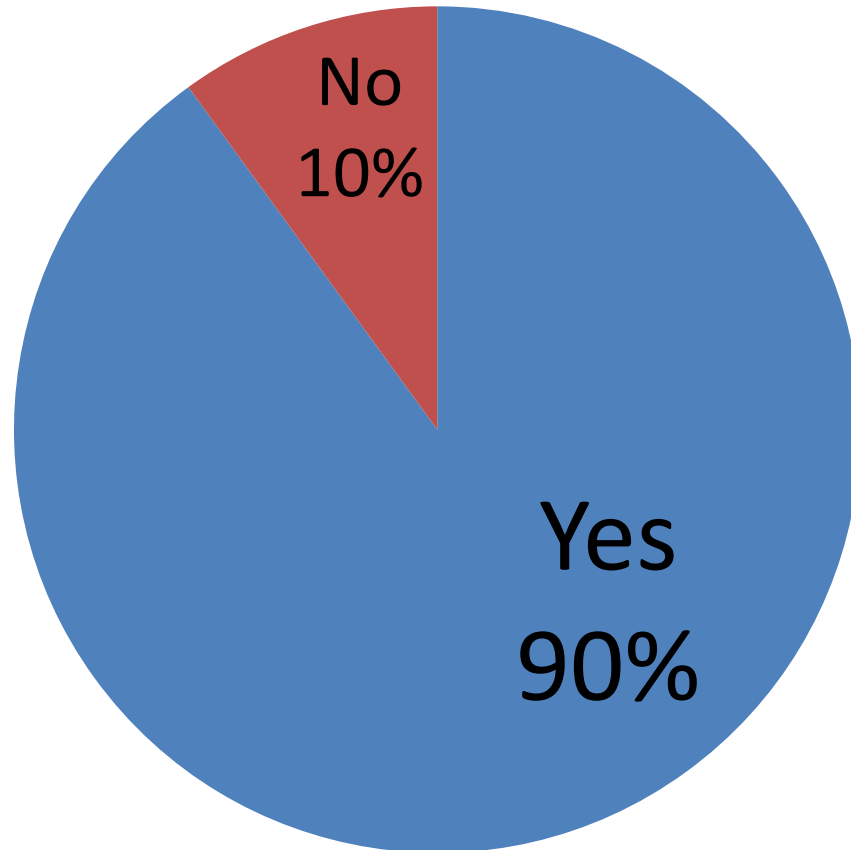

# Organisms isolated in urine culture

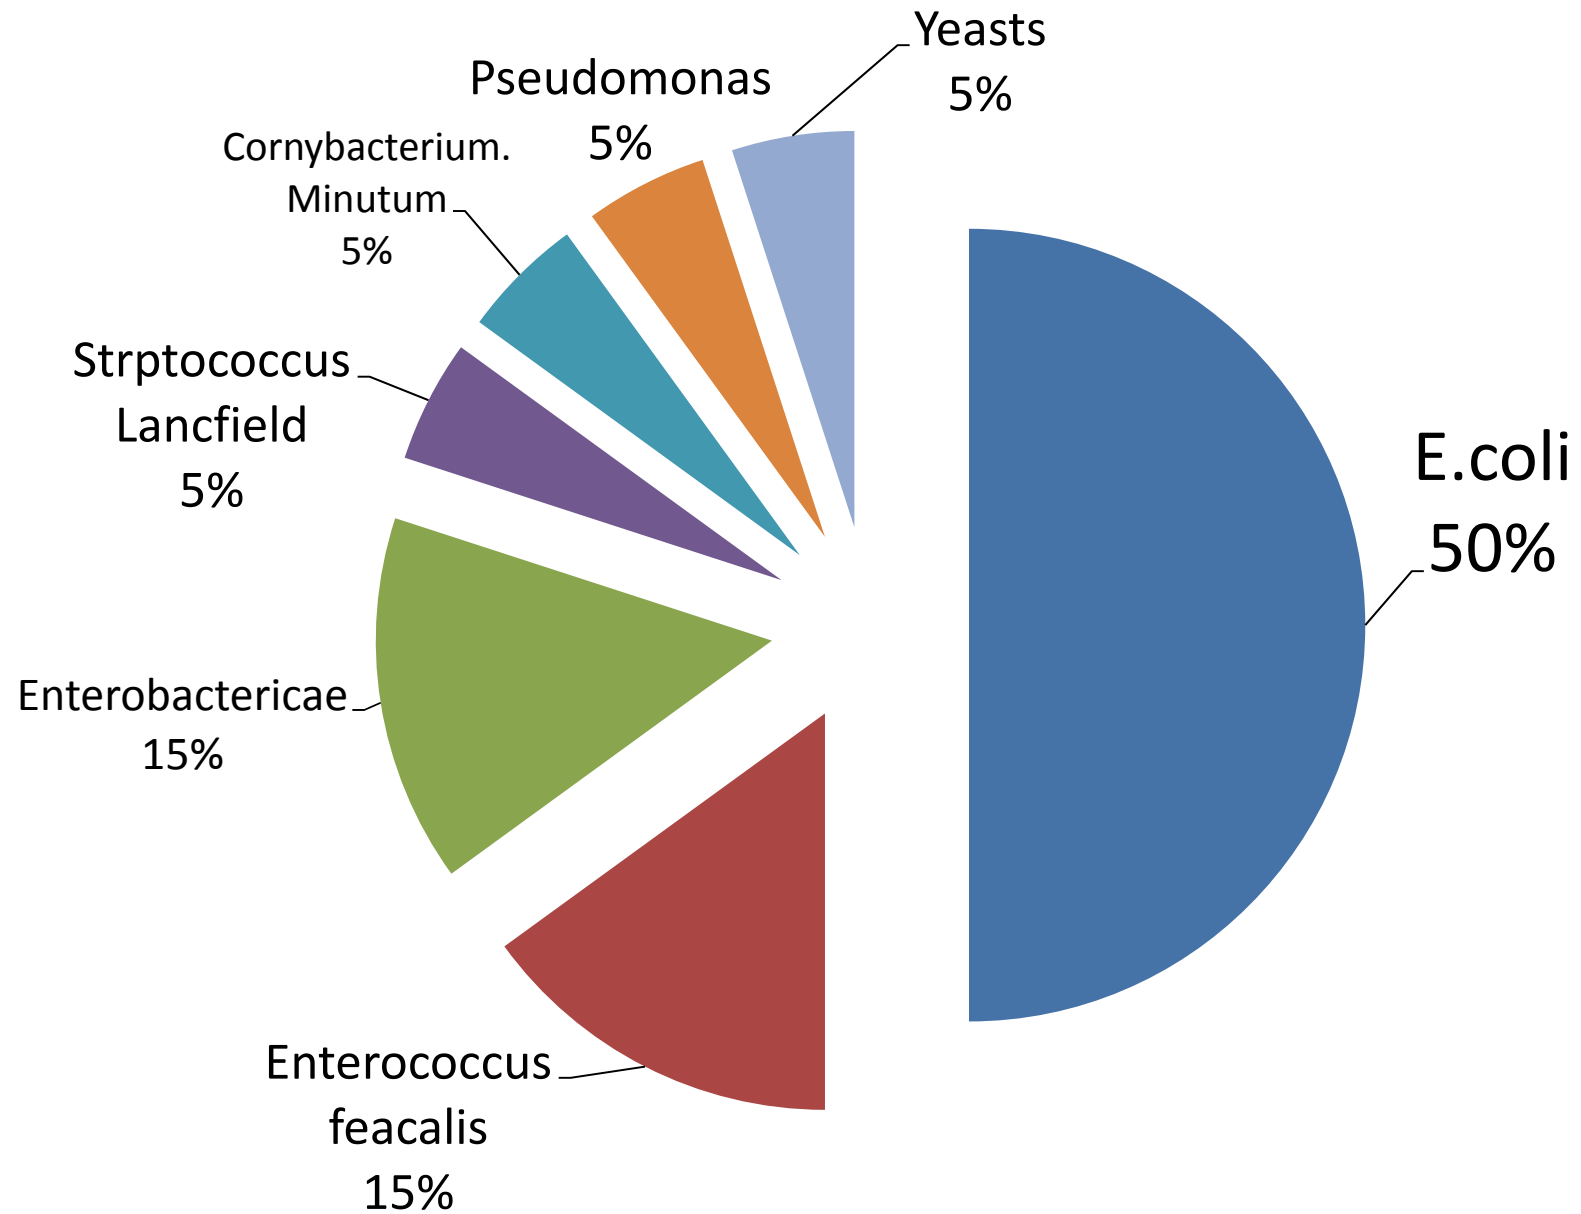



- **Conclusion:**

- ❖ 35% patients not given any antibiotics at all.
- ❖ Stop/review date on 100% of the drug charts
- ❖ Reduction in number of patients given >1 antibiotic.
- ❖ Reduced duration of antibiotics
- ❖ Antibiotic compliance to guidelines is 100%
